# Supplementary material for: Parameter Identifiability and Redundancy: Theoretical Considerations
Source: PLoS One. 2010 Jan 27;5(1):e8915. doi: 10.1371/journal.pone.0008915 (PMC2811744; doi:10.1371/journal.pone.0008915)
Supplement: Text S1 — (0.33 MB DOC) [file pone.0008915.s001.doc]

**Supplementary material A.**

**Proof of Theorem 1**

In this Section we outline a proof of Theorem 1 in the main text. To prove this result we need the following lemma of Rudin [19](p.229).

**Lemma A1.** Suppose are non-negative integers s.t ., and is a function where is an open set. Suppose that . Fix and put , and let and let be a linear projection operator () s.t. and . Then , open sets and a bijective function whose inverse is also and s.t. where is a function.

We now restate Theorem 1 here.

**Theorem A2.** Suppose that the log-likelihood is as a function of the parameter vector , and for all.

1. Suppose that for some and it is the case that . Then turning points of the likelihood in the neighborhood of are isolated, i.e., there is an open neighborhood for which there is at most one that satisfies .
2. Suppose that for some and it is the case that then local maxima of the likelihood in the neighborhood of are isolated, i.e., there is an open neighborhood for which there is at most one that is a local maximum of .
3. Suppose that for some and all it is the case that then all local maxima of the likelihood in are not isolated, as indeed are all for which .

**Proof:**

(i) Let be defined by . Since is , is on . By assumption is of full rank at . By the inverse function theorem [19](pp.221-223) there are open such that and a bijective function such that for all . In particular there can be at most a single for which . **QED.**

(ii) By (i) there is an open neighborhood for which if is such that then for . Suppose now that is a local maximum of . Any member of this neighborhood other than cannot be a turning point, and so by the Mean Value Theorem (Rudin 1976, p.107) cannot be a local maximum. **QED.**

(iii) Let be defined by . Since is

, is on . By assumption for all . Suppose that is a local maximum of . Let (), and choose some arbitrary projection s.t. , and let . By Lemma A1 there are open sets with and a bijective mapping with inverse s.t. where is a function.

Since is a local maximum of , by the Mean Value Theorem [19](p.107) . Now choose some non-trivial vector and define a function, as we can, on some interval by . Because is bijective and is non-trivial . Also, it is the case that:

(A1)

Define by . By the chain rule [19](p.215) . Finally, by the Mean Value Theorem [19](p.107) must be constant; in particular and so all points must also be local maxima of . Therefore is not an isolated local maximum. Since all we used about was that , the above argument also shows that turning points cannot be isolated: . **QED.**

**Supplementary material B.**

**Specification of embedded exponential family model**

In this Section we outline the specification of an embedding of a stochastic cancer model in a general class of statistical models, the so-called exponential family [18]. This is often done in fitting cancer models to epidemiological and biological data (e.g., see references [12, 13, 14, 24]). Recall that a model is a member of the exponential family if the observed data is such that the log-likelihood is given by for some functions . We assume that the natural parameters are functions of the model parameters and some auxiliary data , and that . Here is the cancer hazard function (for example, that of Little *et al.* [14], as also specified in the main text and in Text S1 Section B of Little *et al.* [12]), are some further auxiliary data, and we assume that the are all non-zero. [Note: this is not necessarily a generalized linear model (GLM).] In this case it is seen that

(B1)

so that the Fisher information matrix is given by

(B2)
